# Supplementary material
Source: Research Square preprint supplement (doi:10.21203/rs.3.rs-9232486/v1)
Supplement: Supplementary file 1 [file 02b8b06d11c43316144fd342.docx]

**Supplementary Table 1. Molecular and clinicopathological characteristics of HER2-positive colorectal cancer cases**

|  | primary tumor location | HER2 IHC score | FISH  *HER2/CEP17* ratio | FISH  *HER2* copy number | NGS  *HER2* amplification | *RAS*  status |
| --- | --- | --- | --- | --- | --- | --- |
| 1 | R | 3+ | 5.5 | 11.7 | + | wt |
| 2 | S | 3+ | 8.6 | 15.8 | NA | wt |
| 3 | R | 3+ | 12.2 | 21.4 | + | wt |
| 4 | R | 3+ | NA | NA | + | wt |
| 5 | A | 3+ | NA | NA | + | mt |
| 6 | C | 3+ | NA | NA | + | wt |
| 7 | R | 3+ | NA | NA | + | mt |
| 8 | R | 3+ | NA | NA | + | mt |
| 9 | R | 3+ | NA | NA | + | wt |
| 10 | R | 3+ | NA | NA | + | wt |
| 11 | C | 3+ | NA | NA | + | mt |
| 12 | T | 3+ | NA | NA | NA | mt |
| 13 | S | 3+ | NA | NA | NA | wt |
| 14 | R | 3+ | NA | NA | NA | wt |
| 15 | A | 3+ | NA | NA | NA | wt |
| 16 | S | 3+ | NA | NA | NA | wt |
| 17 | S | 3+ | NA | NA | NA | mt |
| 18 | S | 3+ | NA | NA | NA | wt |
| 19 | T | 3+ | NA | NA | NA | wt |
| 20 | S | 3+ | NA | NA | NA | wt |
| 21 | S | 3+ | NA | NA | NA | wt |
| 22 | R | 3+ | NA | NA | NA | wt |
| 23 | S | 3+ | NA | NA | NA | wt |
| 24 | R | 3+ | NA | NA | NA | wt |
| 25 | A | 3+ | NA | NA | NA | wt |
| 26 | S | 3+ | NA | NA | NA | mt |
| 27 | S | 2+ | 2 | 6.8 | + | wt |
| 28 | R | 2+ | 2 | 4.8 | NA | mt |
| 29 | T | 2+ | 2.3 | 5.4 | NA | wt |
| 30 | T | 2+ | 2.3 | 7.4 | NA | wt |
| 31 | R | 2+ | 2.4 | 4.7 | NA | mt |
| 32 | A | 2+ | 2.5 | 5.2 | NA | wt |
| 33 | S | 2+ | 3 | 6.5 | NA | wt |
| 34 | S | 2+ | 3.4 | 8.8 | NA | wt |
| 35 | A | 2+ | 3.8 | 18.3 | + | wt |
| 36 | A | 2+ | 4.8 | 23.2 | NA | wt |
| 37 | R | 2+ | 5.3 | 18.9 | NA | wt |
| 38 | S | 2+ | 5.8 | 16.3 | NA | wt |
| 39 | S | 2+ | 6.7 | 15.3 | NA | mt |
| 40 | R | 1+ | 2.3 | 6.6 | + | mt |
| 41 | R | 1+ | NA | NA | + | wt |
| 42 | S | NA | 2.3 | 6.4 | NA | mt |
| 43 | S | NA | NA | NA | + | wt |
| 44 | R | NA | NA | NA | + | wt |
| 45 | R | NA | NA | NA | + | wt |

Abbreviation: A, ascending colon; C, cecum; IHC, immunohistochemistry; MMR, mismatch repair; MSI, microsatellite instability; MSS, microsatellite stable; NA, not available; NGS, next-generation sequencing; pMMR, proficient mismatch repair; R, rectum; S, sigmoid colon; T, transverse colon; wt, wild type; mt, mutant.

**Supplementary Table 2. Baseline characteristics of those with HER2-positive / *RAS* wild-type tumors who received first-line chemotherapy with anti-EGFR antibody or bevacizumab**

|  |  | anti-EGFR antibody  **N=17** | bevacizumab  **N=9** |
| --- | --- | --- | --- |
| Age, year | Median (range) | 61 (36-78) | 69 (52-80) |
| Sex | Female | 5 (29.4) | 4 (44.4) |
|  | Male | 12 (70.6) | 5 (55.6) |
| ECOG PS | 0 | 14 (82.4) | 3 (33.3) |
|  | ≥1 | 3 (17.6) | 6 (66.7) |
| Primary tumor location | Left | 16 (94.1) | 4 (44.4) |
|  | Right | 1 (5.9) | 5 (55.6) |
| 1st line regimen | fluoropyrimidine+oxaliplatin | 16 (94.1) | 6 (66.7) |
|  | fluoropyrimidine+irinotecan | 0 | 2 (22.2) |
|  | fluoropyrimidine+oxaliplatin+irinotecan | 1 (5.9) | 1 (11.1) |

Data are shown as median (range) values or patient numbers.

Abbreviations: ECOG PS, Eastern Cooperative Oncology Group performance status.

**Supplementary Table 3. ORR by first-line regimen in patients with HER2-positive and *RAS* wild-type tumors**

|  | anti-EGFR group (N=17) | bevacizumab group (N=9) |
| --- | --- | --- |
| CR | 0 | 0 |
| PR | 10 (58.8%) | 9 (100%) |
| SD | 5 (29.4%) | 0 |
| PD | 1 (5.9%) | 0 |
| NE | 1 (5.9%) | 0 |
| ORR | 58.8% | 100% |
| DCR | 88.2% | 100% |

Abbreviations: CR, complete response; DCR, disease control rate; NE, not evaluable; ORR, overall response rate; PD, progressive disease; PR, partial response; SD, stable disease
